# Supplementary material for: ＜Editors’ Choice＞ : Comparison of clinical features between patients with acute exacerbation of idiopathic interstitial pneumonia and collagen vascular disease-associated interstitial pneumonia
Source: PubMed Central journal article supplement — Nagoya J Med Sci. 2023 Aug;85(3):602–11. doi: 10.18999/nagjms.85.3.602 (PMC10565576; doi:10.18999/nagjms.85.3.602), 2023-08
Supplement: 2186-3326-85-0602-s001.pdf [file 2186-3326-85-0602-s001.pdf]

SUPPLEMENTARY MATERIAL

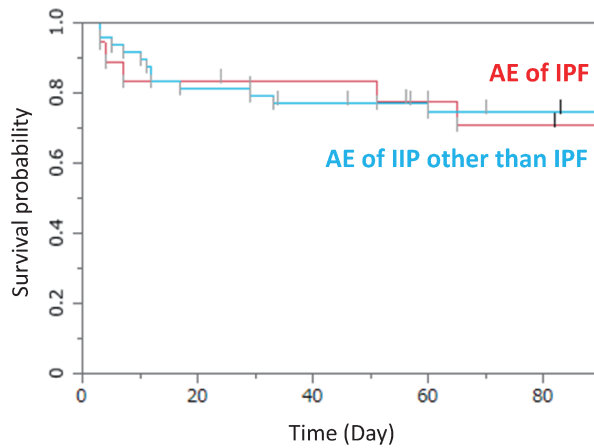

**Supplement Fig.** Survival curves for patients with AE of IIP other than IPF and AE of IPF. The clinical characteristics including age, serum LDH, serum KL-6, PaO<sub>2</sub>/FiO<sub>2</sub> ratio, CCIS, and HRCT scores had no significant differences between AE of IIP other than IPF and AE of IPF and the survival curves was also similar ( $P = 0.808$ ).

AE: acute exacerbation

CCIS: Charlson Comorbidity Index score

HRCT: high-resolution computed tomography

IIP: idiopathic interstitial pneumonia

IPF: idiopathic pulmonary fibrosis

KL-6: Krebs von den Lungen-6

LDH: lactate dehydrogenase

PaO<sub>2</sub>/FiO<sub>2</sub>: partial pressure of oxygen in arterial blood/fraction of inspired oxygen
